# Supplementary material for: Self-assembly synthesis of Co3O4/multiwalled carbon nanotube composites: an efficient enzyme-free glucose sensor
Source: Royal Society of Chemistry journal article supplement (doi:10.1039/c5nj01447f), 2015-01-01
Supplement: c5nj01447f1.pdf [file c5nj01447f1.pdf]

## Supporting Information

### Self-assembly synthesis of $\text{Co}_3\text{O}_4$ / multi walled carbon nanotubes

#### composites: An efficient enzyme-free glucose sensor

Raghavendra Prasad and Badekai Ramachandra Bhat \*

*Catalysis and Materials Laboratory, Department of Chemistry, National Institute of Technology Karnataka,*

*Surathkal, Srinivasnagar-575025, India,*

\* Corresponding author e-mail: [ram@nitk.edu.in](mailto:ram@nitk.edu.in)

Fig. S1

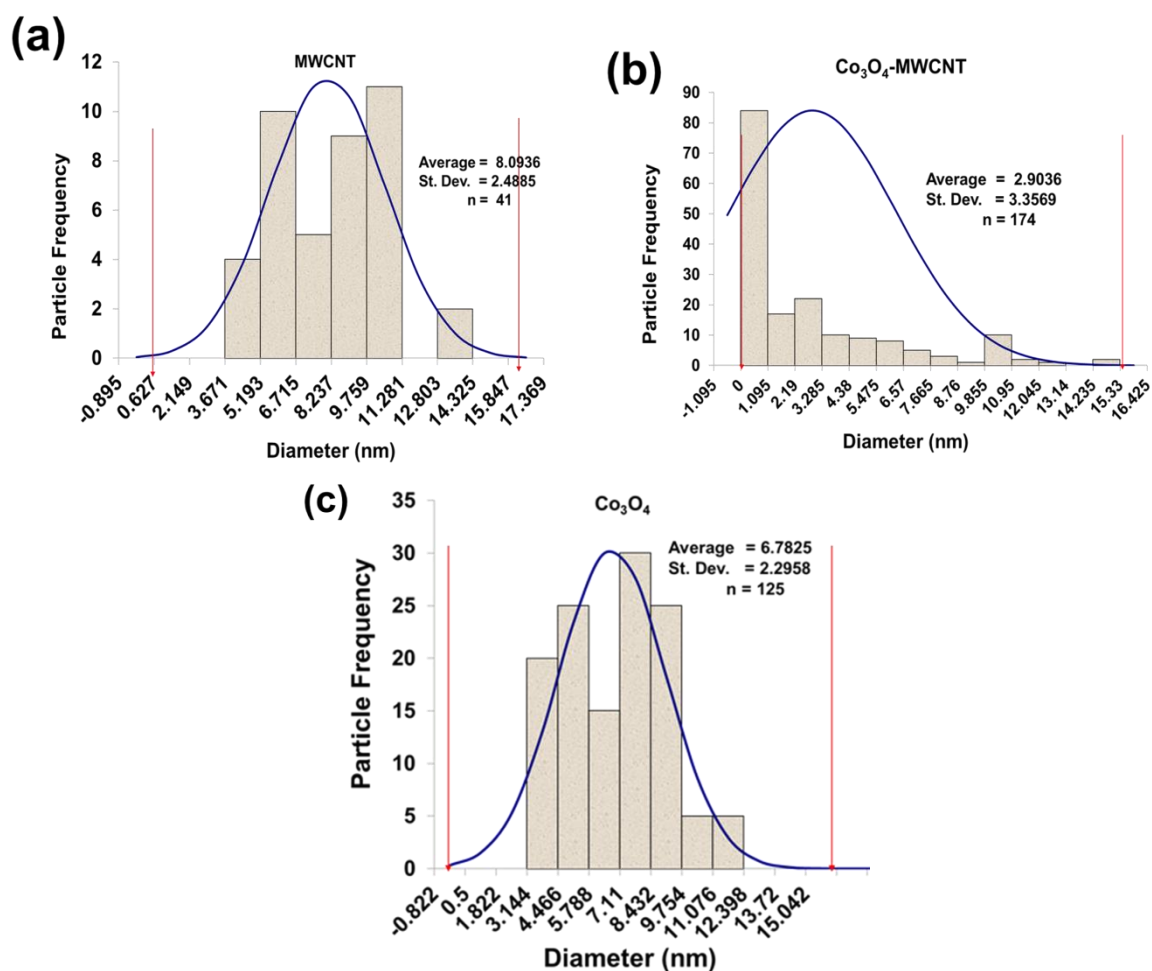

Fig. S1 The size distribution histograms and corresponding Gaussian fits. (a) MWCNT (b)  $\text{Co}_3\text{O}_4$ -MWCNT composite and (c)  $\text{Co}_3\text{O}_4$ .

**Fig. S2**

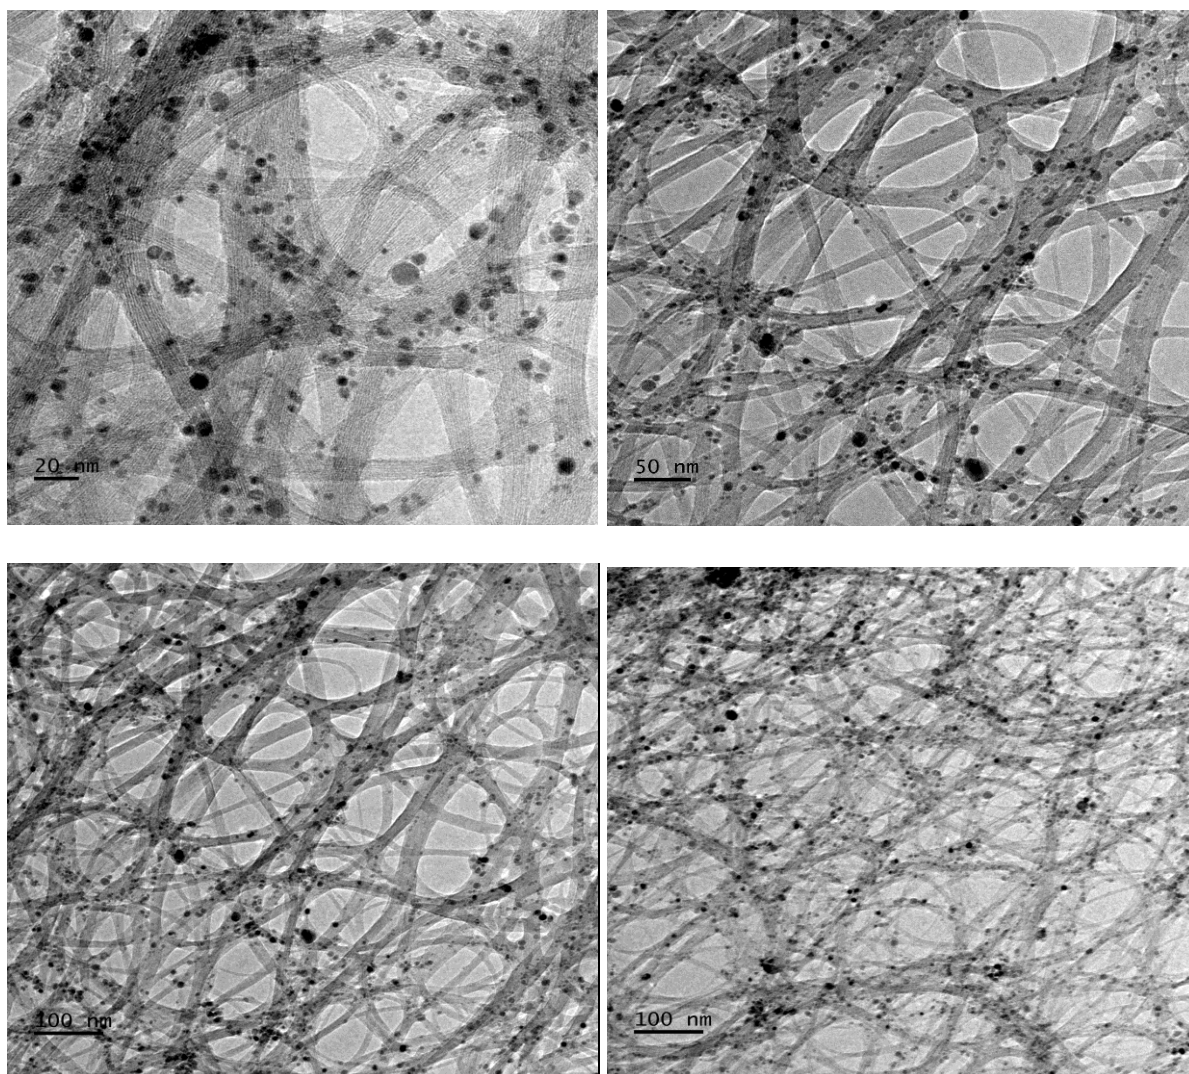

**Fig. S2** The TEM images of  $\text{Co}_3\text{O}_4$ -MWCNT composite at different magnification (20 nm, 50 nm and 100 nm).

Fig. S3

### Glucose concentration studies

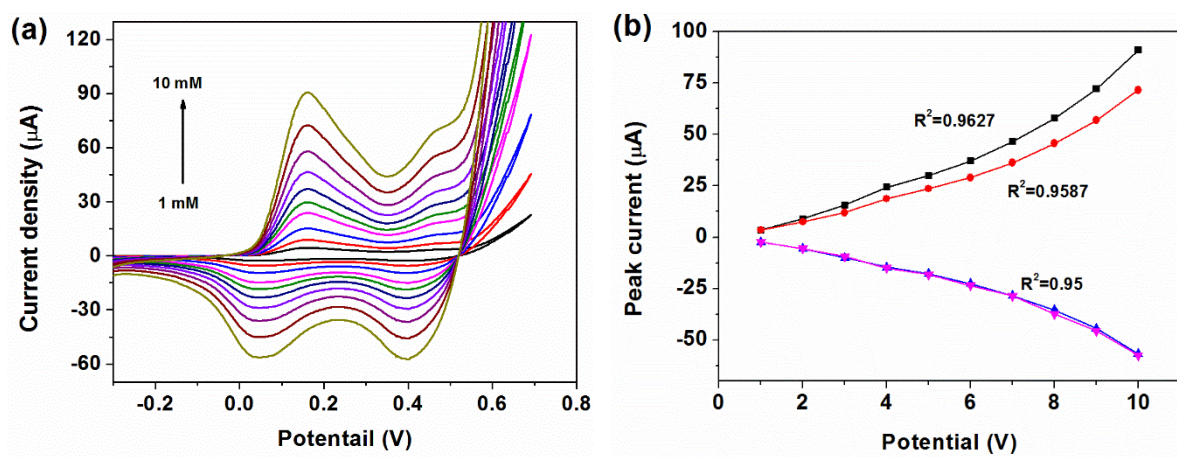

**Fig. S3** (a) CV spectra of Co<sub>3</sub>O<sub>4</sub>-MWCNT/GCE for different glucose concentration (1 mM to 10 mM) in 0.2 M NaOH solution at 50 mV s<sup>-1</sup> and (b) plot of peak current vs. potential with the linear regression values calculated.

Fig. S3 shows the CV spectra of Co<sub>3</sub>O<sub>4</sub>-MWCNT/GCE for various glucose concentrations. It is observed that the magnitude of the electrochemical response current of the Co<sub>3</sub>O<sub>4</sub>-MWCNT/GCE increases with increasing concentration of glucose (Fig. S3 (a)). It can be attributed to the catalytic action of Co<sub>3</sub>O<sub>4</sub> bound on the MWCNT surface that acts as a high surface area matrix and facilitates higher electron transfer rate. From the linear relationship measurements, the regression coefficient values of anodic and cathodic peaks are found to be  $R^2 = 0.96, 0.9587, 0.95$  and  $0.95$  respectively (Fig. S3 (b)). These results suggest that the synergistic effect of Co<sub>3</sub>O<sub>4</sub> and MWCNT will effectively enhance the direct electrocatalytic oxidation of glucose.
